# Supplementary material
Source: PubMed Central journal article supplement (PMC2764062)
Supplement: mmc1.pdf [file mmc1.pdf]

Biophysical Journal, Volume 97

**Supporting Material**

**Streptavidin 2D crystal substrates for visualizing biomolecular processes by atomic force microscopy**

Daisuke Yamamoto, Naoki Nagura, Saeko Omote, Masaaki Taniguchi, and Toshio Ando

## **Supplemental Information**

### **Streptavidin 2D crystal substrates for visualizing biomolecular processes by atomic force microscopy**

**Daisuke Yamamoto, Naoki Nagura, Saeko Omote, Masaaki Taniguchi, and Toshio Ando**

#### **Movie Legend**

**Movie S1.** The polymerization process of a single actin filament on the streptavidin type-2 *P2* crystal surface observed by high-speed AFM. Initially, the actin filament is in a full form. To produce both barbed and pointed ends located in close proximity, the actin filament was partially dissected by an increased tapping force exerted from an oscillating cantilever tip. The stepwise elongation of the filament at the newly produced barbed end on the left-hand is clearly seen. The successive images were recorded at an imaging rate of 0.25 s/frame, scanning area of  $150 \times 75 \text{ nm}^2$  and a pixel size of  $256 \times 128$ . The z-scale is 11 nm.
